# Supplementary material for: Maternal Factors in Pregnancy and Ethnicity Influence Childhood Adiposity, Cardiac Structure, and Function
Source: PubMed Central journal article supplement (PMC9343669; doi:10.3389/fped.2022.900404), 2022-07-19
Supplement: Data_Sheet_1.pdf [file Data_Sheet_1.pdf]

## Supplementary Figures and Tables

**Suppl. Figure 1:** Image of a 2D echo 4-Chamber view, with the pulse wave cursor through the mitral valve. At the bottom of the image is the Pulse Wave Doppler trace of the mitral inflow velocities with the E and A waves labelled.

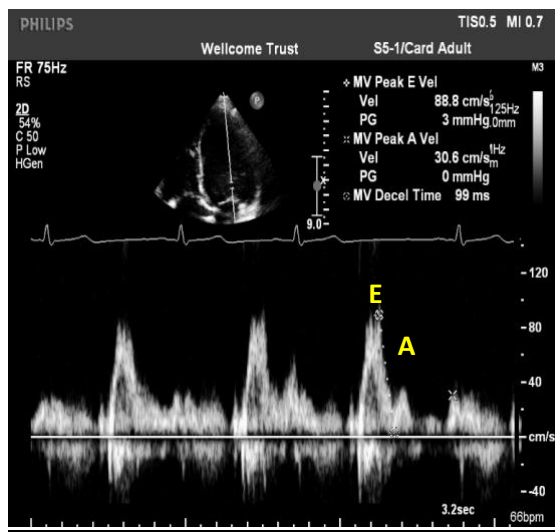

**Suppl. Table 1: Correlations of maternal data with body fat at median 9 years.** Maternal glucose (fasting and 2-hour post OGTT) and BMI were measured at 28 weeks and correlated with child's body composition taken at median 9 years of age. Correlation coefficients (r) are shown with with p values (#  $p \leq 0.05$  and \*  $p \leq 0.01$ ).

| <b>Maternal data ↓</b> | <b>Child data →</b> | <b>BMI</b>        | <b>Body fat</b>   | <b>Arm fat</b>    | <b>Truncal fat</b> | <b>Supra iliac SFT</b> | <b>Triceps SFT</b> | <b>Subscapular SFT</b> |
|------------------------|---------------------|-------------------|-------------------|-------------------|--------------------|------------------------|--------------------|------------------------|
| <b>Fasting glucose</b> |                     | 0.07              | 0.28 <sup>#</sup> | 0.23 <sup>#</sup> | 0.23 <sup>#</sup>  | 0.22 <sup>#</sup>      | 0.14               | 0.14                   |
| <b>2hr glucose</b>     |                     | 0.11              | 0.23 <sup>#</sup> | 0.26 <sup>#</sup> | 0.20               | 0.15                   | 0.17               | 0.07                   |
| <b>BMI</b>             |                     | 0.28 <sup>*</sup> | 0.25 <sup>#</sup> | 0.19              | 0.25 <sup>#</sup>  | 0.24 <sup>#</sup>      | 0.26 <sup>*</sup>  | 0.27 <sup>*</sup>      |

**Suppl. Table 2: Generalised Linear Modelling** with Child's Whole Body Fat or Truncal Fat (%) as dependent variable and ethnicity (reference group SA), gender (reference group male), maternal fasting glucose and maternal BMI as covariates. Significant values (in bold) are represented by: #  $p \leq 0.05$ , \*  $p \leq 0.01$  and ‡  $p \leq 0.001$ .

**A: Whole cohort:**

| Marker                   | $\beta$ | Std. Error | 95% CI |       | Chi-square    |
|--------------------------|---------|------------|--------|-------|---------------|
|                          |         |            | Lower  | Upper |               |
| <b>Whole Body Fat:</b>   |         |            |        |       |               |
| Ethnicity                | -5.3    | 1.3        | -7.9   | -2.8  | <b>16.6</b> ‡ |
| Gender                   | 4.6     | 1.3        | 2      | 7.2   | <b>11.7</b> ‡ |
| Maternal Fasting Glucose | 0.9     | 1.7        | -2.5   | 4.2   | 0.3           |
| Maternal BMI             | 0.3     | 0.2        | 0.03   | 0.7   | <b>4.6</b> #  |
| <b>Truncal Fat:</b>      |         |            |        |       |               |
| Ethnicity                | -5.1    | 1.2        | -7.5   | -2.8  | <b>18.4</b> ‡ |
| Gender                   | 3.4     | 1.2        | 1      | 5.8   | <b>7.7</b> *  |
| Maternal Fasting Glucose | 1.0     | 1.6        | -2.0   | 4.1   | 0.4           |
| Maternal BMI             | 0.3     | 0.2        | -0.01  | 0.6   | 3.5           |

**B: By gender:**

| Marker                   | $\beta$ | Std. Error | 95% CI |       | Chi-square    |
|--------------------------|---------|------------|--------|-------|---------------|
|                          |         |            | Lower  | Upper |               |
| <b>Whole Body Fat:</b>   |         |            |        |       |               |
| <i>Females</i>           |         |            |        |       |               |
| Ethnicity                | -7.2    | 2.1        | -11.2  | -3.1  | <b>12.1</b> ‡ |
| Maternal Fasting Glucose | -2.9    | 2.2        | -7.3   | 1.5   | 1.7           |
| Maternal BMI             | 1.0     | 0.3        | 0.4    | 1.5   | <b>12.1</b> ‡ |
| <i>Males</i>             |         |            |        |       |               |
| Ethnicity                | -5.7    | 1.5        | -8.6   | -2.8  | <b>14.4</b> ‡ |
| Maternal Fasting Glucose | 5.9     | 2.4        | 1.1    | 0.7   | <b>5.7</b> #  |
| Maternal BMI             | -0.1    | 0.2        | -0.4   | 0.3   | 0.2           |
| <b>Truncal Fat:</b>      |         |            |        |       |               |
| <i>Females</i>           |         |            |        |       |               |
| Ethnicity                | -6.6    | 1.9        | -10.4  | -2.8  | <b>11.5</b> ‡ |
| Maternal Fasting Glucose | -1.9    | 2.1        | -6.0   | 2.3   | 0.8           |
| Maternal BMI             | 0.8     | 0.3        | 0.3    | 1.3   | <b>9.5</b> *  |
| <i>Males</i>             |         |            |        |       |               |
| Ethnicity                | -5.5    | 1.4        | -8.3   | -2.8  | <b>15.9</b> ‡ |
| Maternal Fasting Glucose | 4.7     | 2.3        | 0.23   | 9.1   | <b>4.3</b> #  |
| Maternal BMI             | -0.1    | 0.2        | -0.4   | 0.3   | 0.2           |

**Suppl. Table 3: Comparison of left ventricular indices.** Values are given as mean (SD). All p values for T-Tests are non-significant (>0.05).

|                                  | WE           | SA            |
|----------------------------------|--------------|---------------|
| <b>Left Ventricular Mass/BSA</b> | 65.03 (14.5) | 60.35 (10.52) |
| <b>IVS diastole</b>              | 7.11 (0.99)  | 7.04 (0.95)   |
| <b>LVID diastole</b>             | 39.12 (4.37) | 37.08 (3.64)  |
| <b>LVPW diastole</b>             | 6.61 (1.14)  | 6.5 (1.2)     |
| <b>IVS systole</b>               | 10.17 (1.3)  | 9.52 (1.36)   |
| <b>LVID systole</b>              | 24.24 (3.48) | 23.16 (2.85)  |
| <b>LVPW systole</b>              | 10.56 (1.68) | 10.19 (1.63)  |
